# Supplementary material for: Genome-Wide Association Study Reveals Multiple Loci Influencing Normal Human Facial Morphology
Source: PubMed Central journal article supplement (PMC4999139; doi:10.1371/journal.pgen.1006149), 2016-08-25
Supplement: pgen.1006149.s008.pdf [file pgen.1006149.s008.pdf]

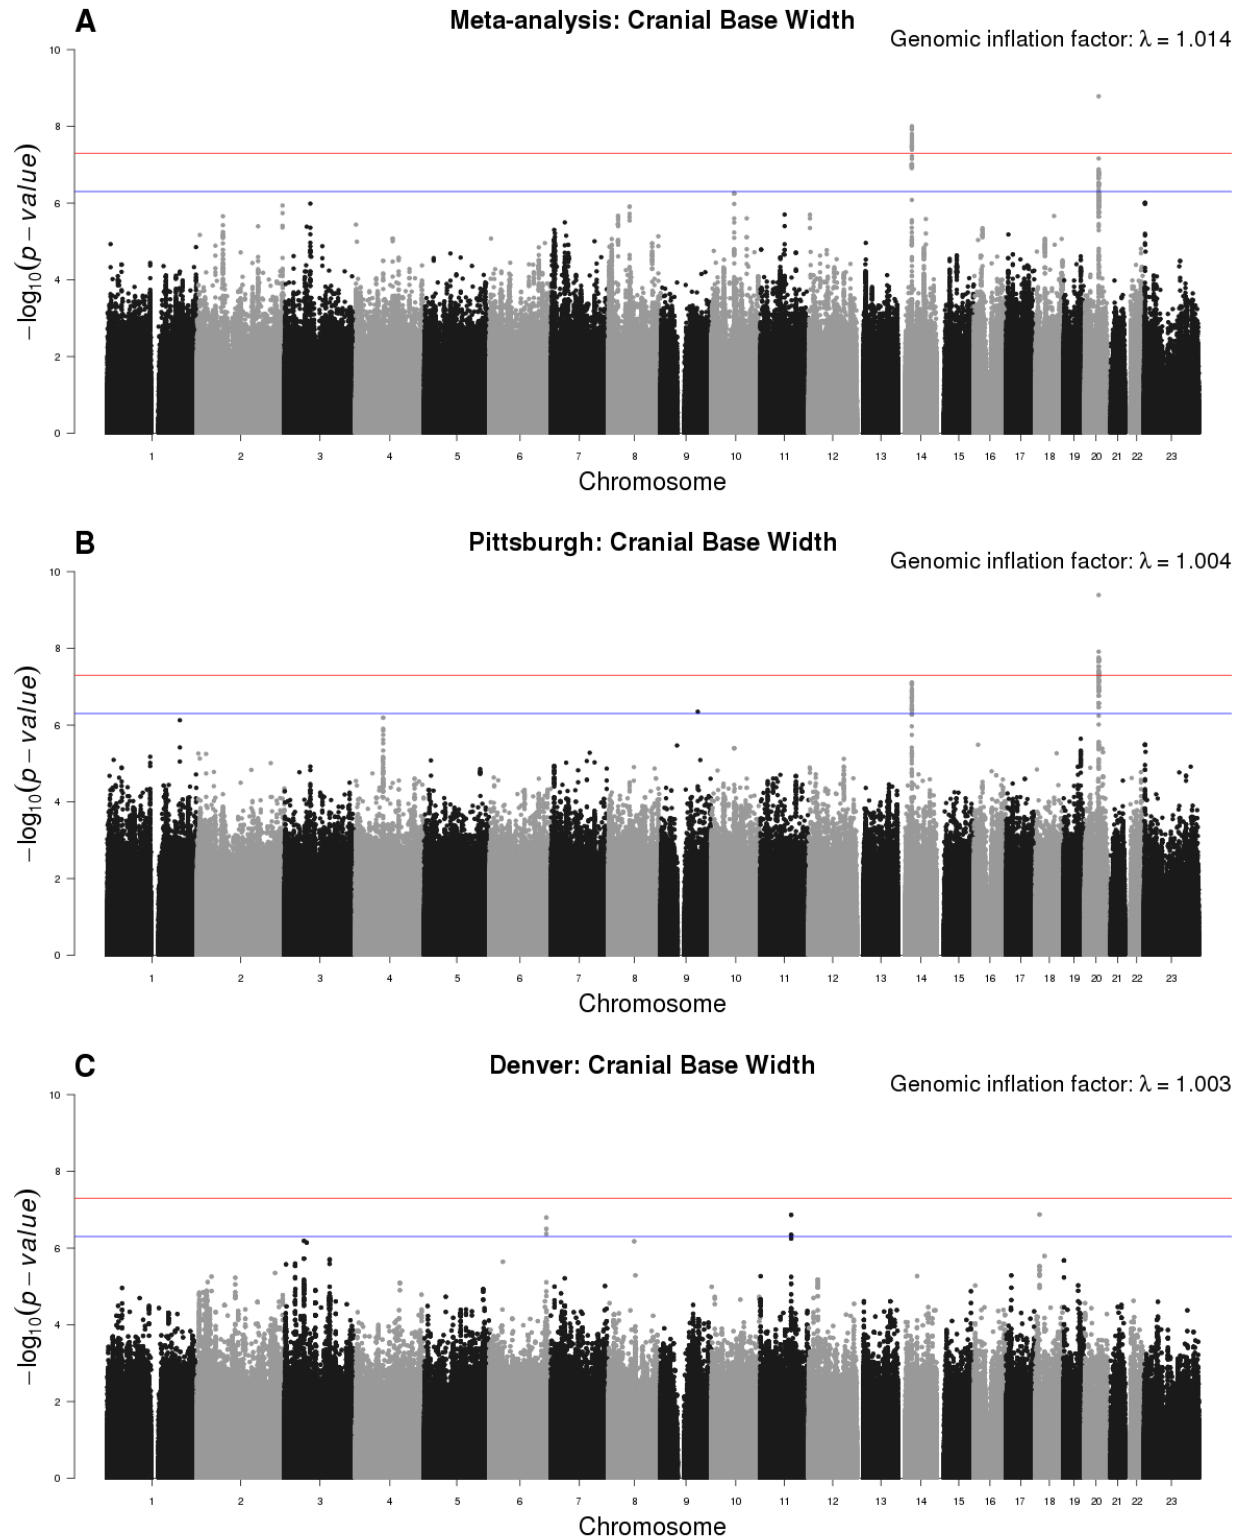

**S1 Fig. Manhattan plots for cranial base width.** (A) meta-analysis results, (B) Pittsburgh sample results, and (C) Denver sample results. Lines for p-value thresholds set at  $5 \times 10^{-8}$  for genome-wide significance and  $5 \times 10^{-7}$  for suggestive significance
