# Supplementary material for: Genome-Wide Association Study Reveals Multiple Loci Influencing Normal Human Facial Morphology
Source: PubMed Central journal article supplement (PMC4999139; doi:10.1371/journal.pgen.1006149), 2016-08-25
Supplement: pgen.1006149.s030.pdf [file pgen.1006149.s030.pdf]

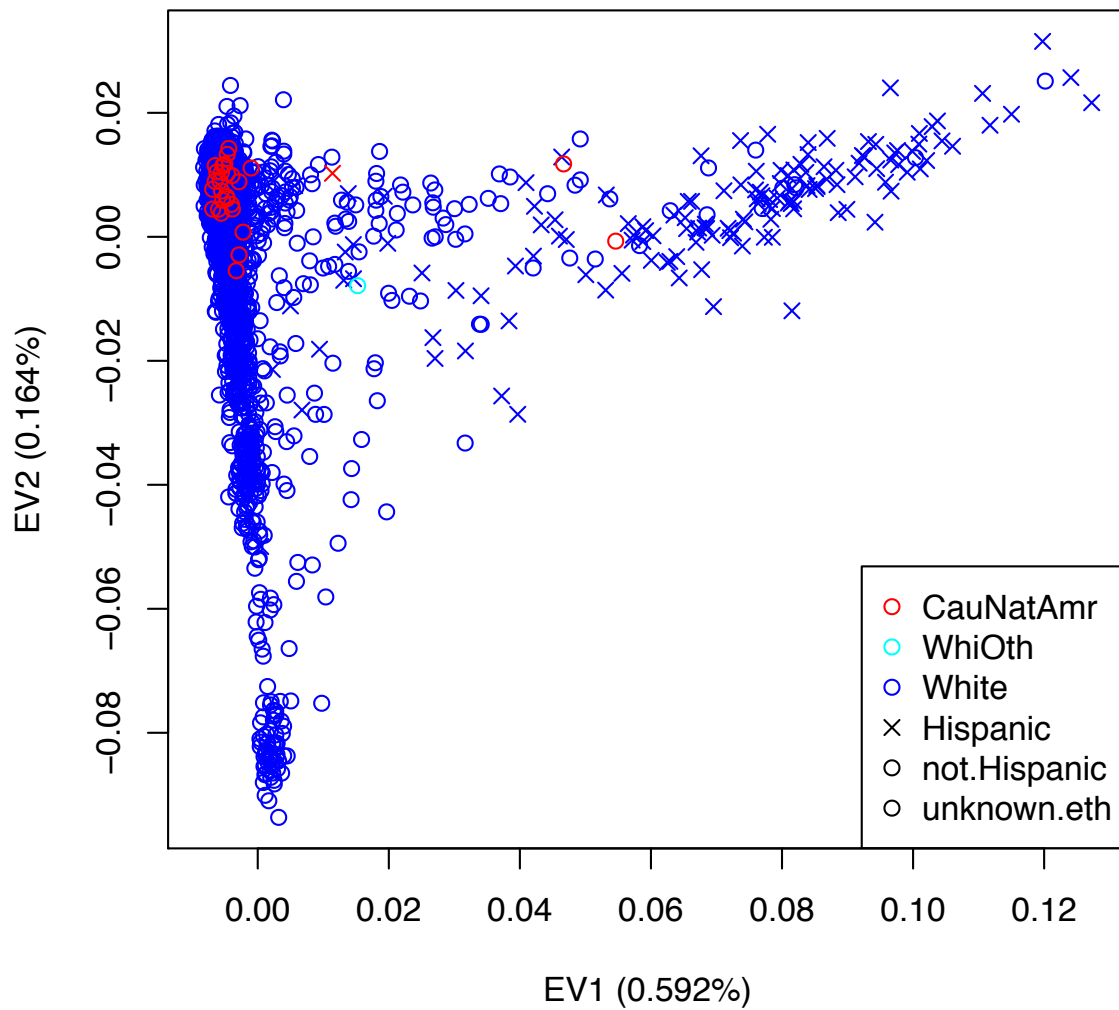

**S23 Fig. Plot showing population stratification across the first two principal components of ancestry (EV1 and EV2).** The proportion of total genetic variation explained by each principal component of ancestry is indicated on the axis.
